# Supplementary material for: Porous Organic Cage-Embedded C10-Modified Silica as HPLC Stationary Phase and Its Multiple Separation Functions
Source: MDPI journal article supplement (doi:10.3390/molecules27248895), 2022-12-14
Supplement: s1 [file s1]

---

## Supporting Information

# Porous Organic Cage-Embedded C10-Modified Silica as HPLC Stationary Phase and Its Multiple Separation Functions

Litao Wang <sup>1</sup>, Siqi Han <sup>1</sup>, Haiyang Yu <sup>1</sup>, Qinghua Yu <sup>1,2</sup>, Dong Pei <sup>3</sup>, Wenjing Lv <sup>1</sup>, Jiasheng Wang <sup>1</sup>, Xingyu Li <sup>1</sup>, Ruifang Ding <sup>1,\*</sup>, Qibao Wang <sup>1,\*</sup> and Mei Lv <sup>1,\*</sup>

1 School of Pharmacy, Jining Medical University, Jining 272000, China

2 School of Pharmacy, Weifang Medical University, Weifang 261000, China

3 Qingdao Center of Resource Chemistry & New Materials, Lanzhou Institute of Chemical Physics, Chinese Academy of Sciences, Qingdao 266000, China

\*Correspondence: lvmei57010@163.com (M.L.); wqb\_wangqibao@163.com (Q.W.); ruifangding@sina.com.cn (R.D.)

## Table of Contents

|                                                                      |   |
|----------------------------------------------------------------------|---|
| 1. Synthesis of RCC3.....                                            | 2 |
| 2. Characterization of RCC3-C10@silica.....                          | 3 |
| 3. The chromatographic data of RCC3-C10@silica stationary phase..... | 6 |

## 1. Synthesis of RCC3

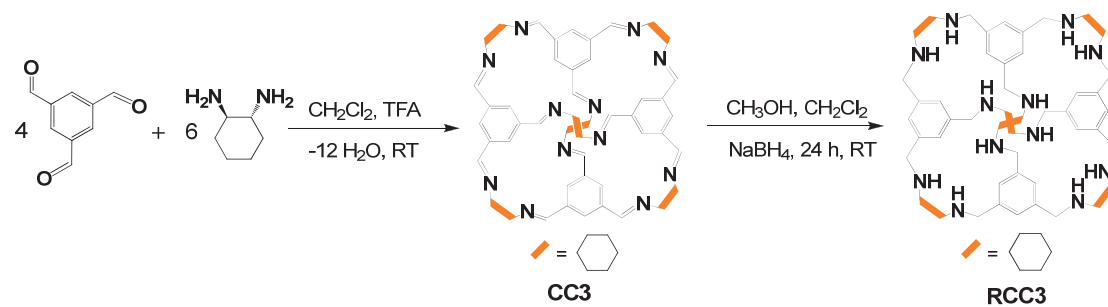

**Figure S1. Synthesis of RCC3**

---

## 2. Characterization of RCC3-C10@silica

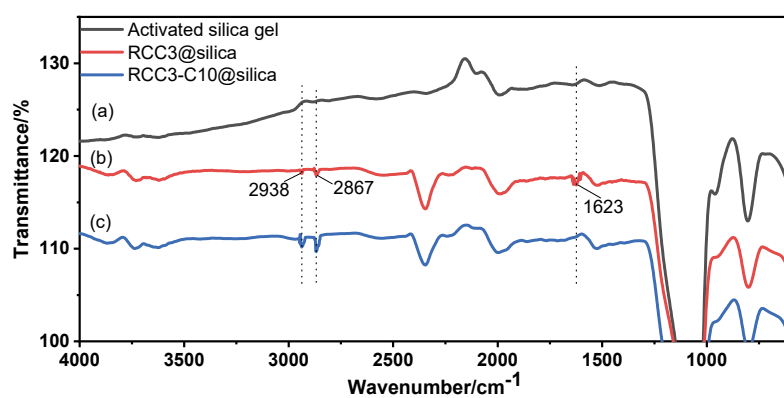

**Figure S2.** FTIR of the silica gel, RCC3@silica, RCC3-C10@silica.

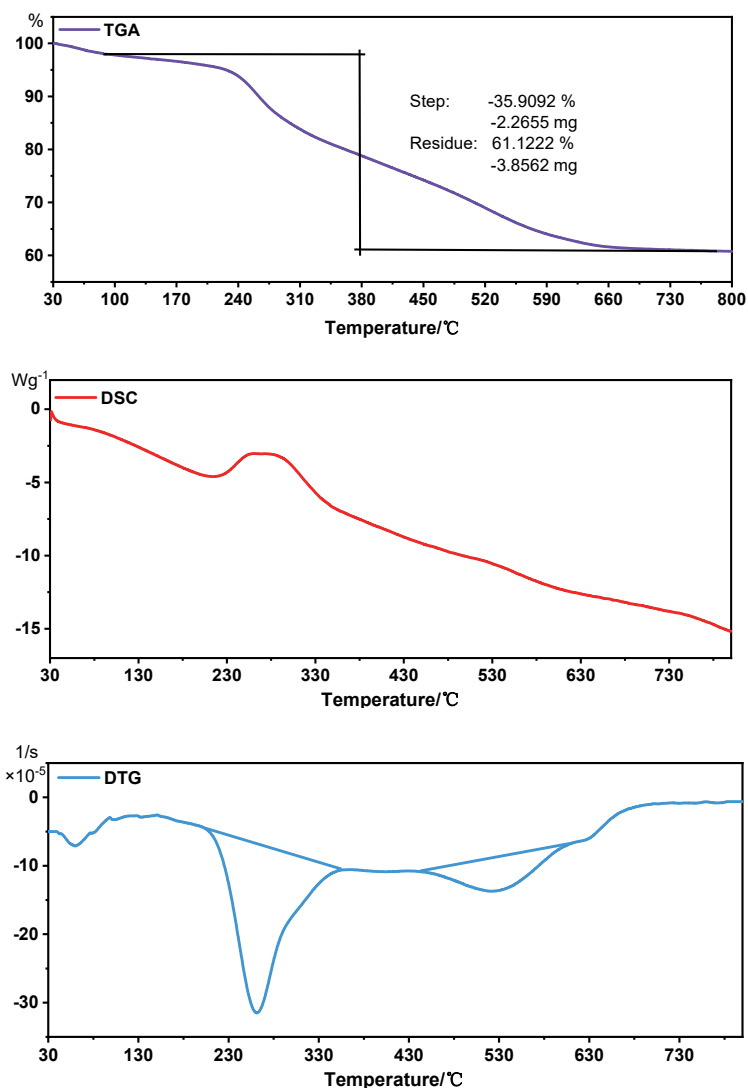

**Figure S3.** TGA, DSC and DTG curves of RCC3-C10@silica stationary phase.

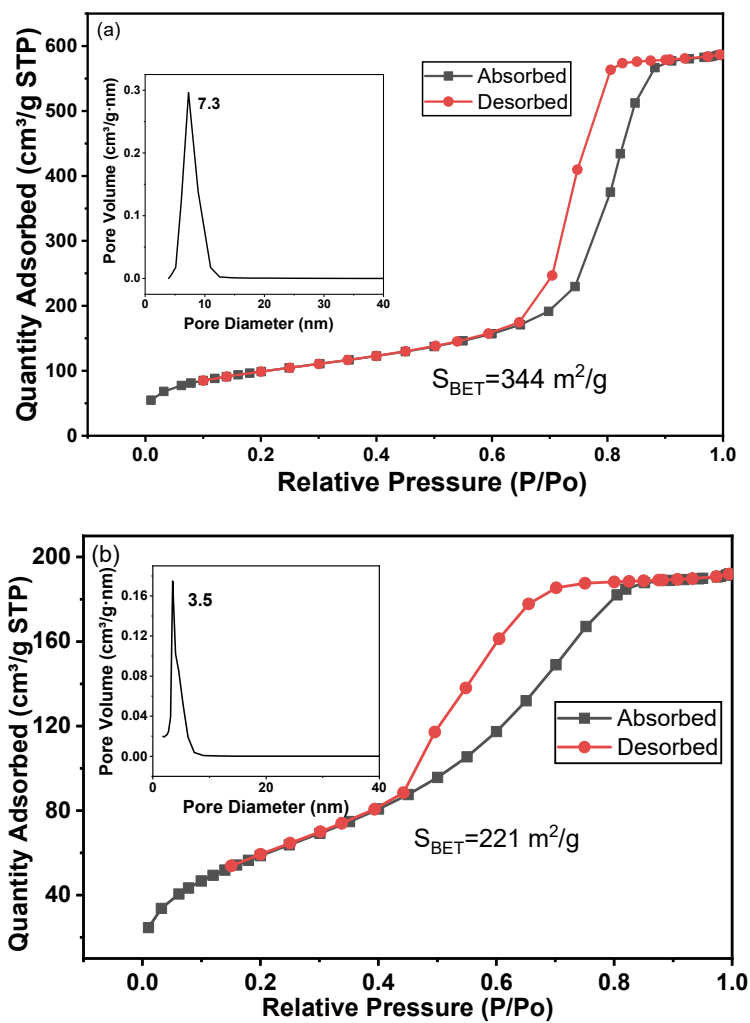

**Figure S4.** Nitrogen adsorption and desorption isotherms on silica gel (a) and RCC3-C10@silica (b).

### 3. The chromatographic data of RCC3-C10@silica stationary phase

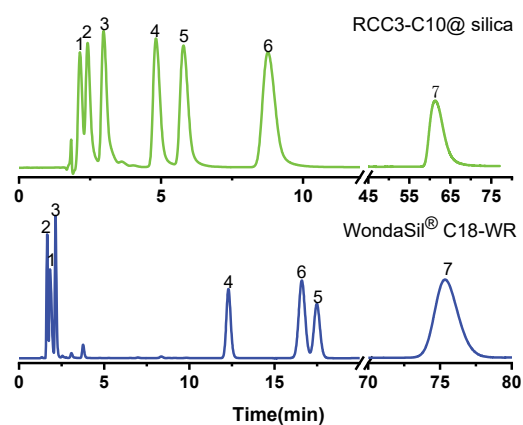

**Figure S5.** Chromatograms of the Tananka test analytes on the RCC3-C10@silica molecular cage column and WondaSil® C18-WR column. Analytes: (1) caffeine, (2) uracil, (3) phenol, (4) butylbenzene, (5) pentyl benzene, (6) o-terphenyl, (7) triphenylene. The mobile phase: 80% methanol/water (v/v); Flow rate: 1.0 ml/min; UV: 254 nm.

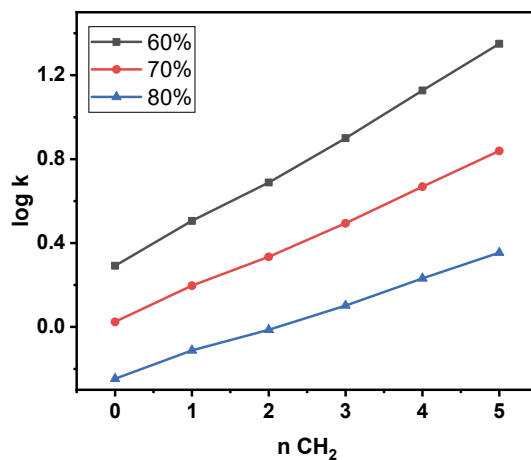

**Figure S6.** Plot of log  $k$  versus methylene number for different mobile phase compositions.

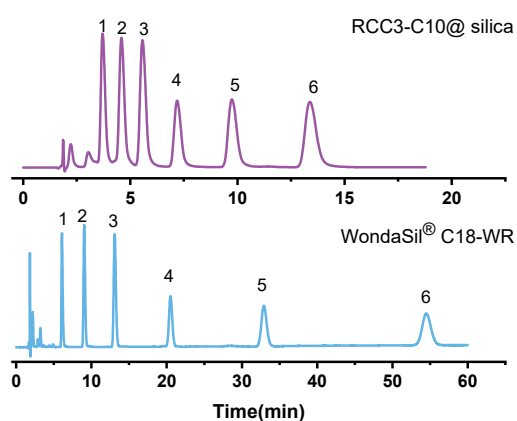

**Figure S7.** Chromatograms of alkyl phenyl cyclic compounds on the RCC3-C10@silica molecular cage column and WondaSil® C18-WR column. Analytes: (1) benzene, (2) toluene, (3) ethylbenzene, (4) propyl benzene, (5) butylbenzene, (6) pentyl benzene. Mobile phase: 70% methanol/water (v/v); Flow rate: 1.0 mL/min; UV: 254 nm.

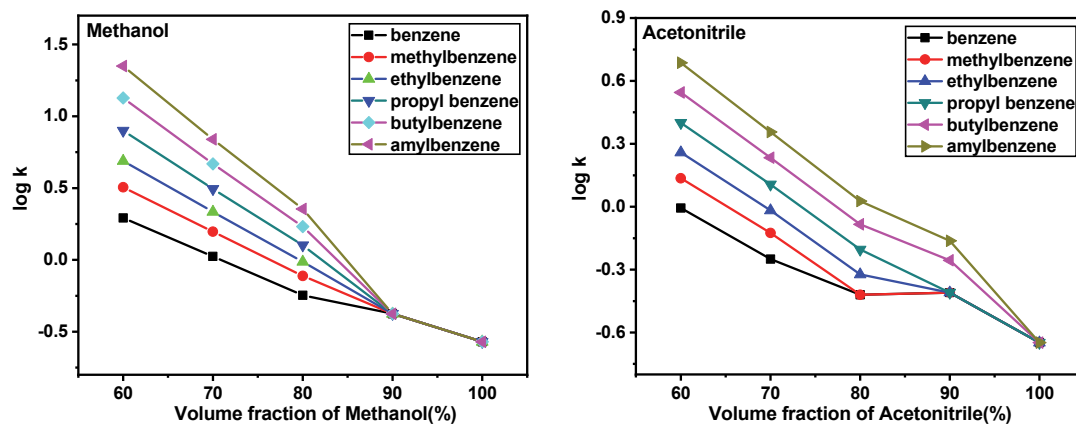

**Figure S8.** Plot of  $\log k$  versus volume fraction of methanol and acetonitrile in mobile phase.

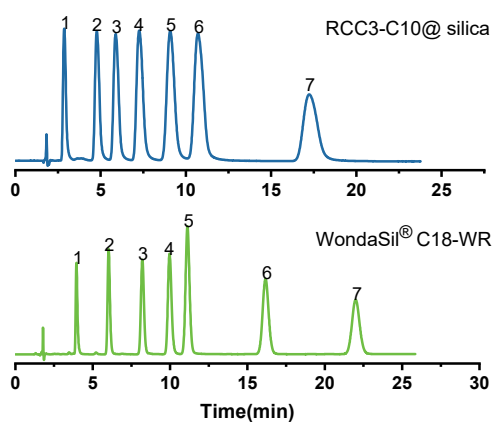

**Figure S9.** Chromatograms of PAHs on the RCC3-C10@silica molecular cage column and WondaSil® C18-WR column. Analytes: (1) benzene, (2) naphthalene, (3) biphenyl, (4) acenaphthene, (5) o-terphenyl, (6) anthracene, (7) m-terphenyl. Mobile phase: 80% methanol/water (v/v); Flow rate: 1.0 ml/min; UV: 254 nm.



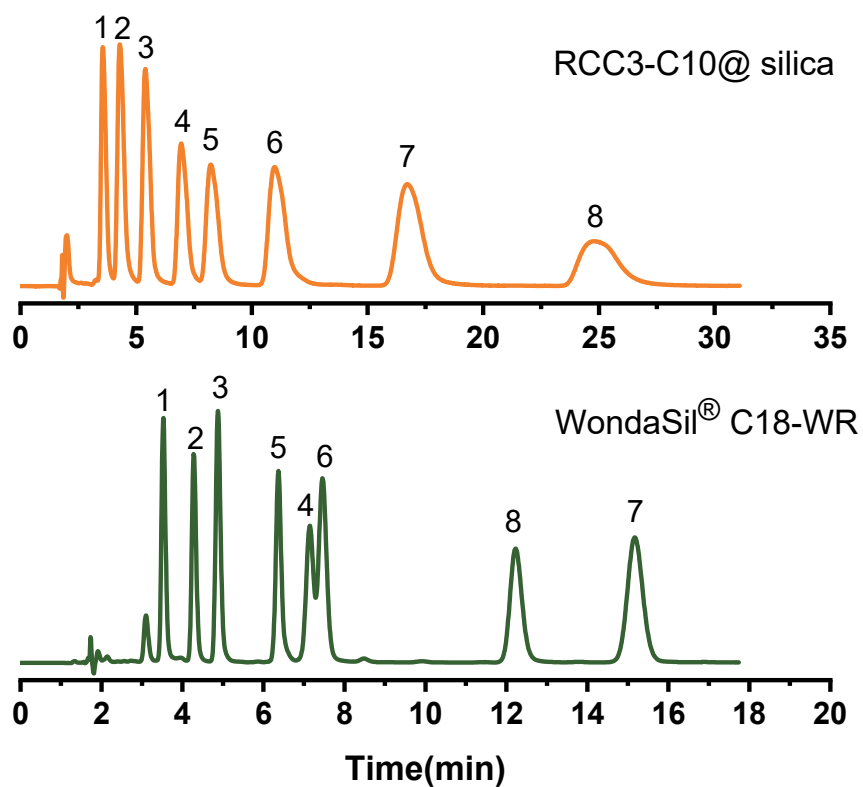

**Figure S10.** Chromatograms of PAHs on the RCC3-C10@silica molecular cage column and WondaSil® C18-WR column. Analytes: (1) 2-methylnaphthalene, (2) anthranone, (3) biphenyl (4) p-terphenyl, (5) pyrene, (6) chrysene, (7) triphenylene, (8) dibenz[a,h]anthracene. Mobile phase: 90% methanol/water (v/v); Flow rate: 1.0 ml/min; UV: 254 nm.

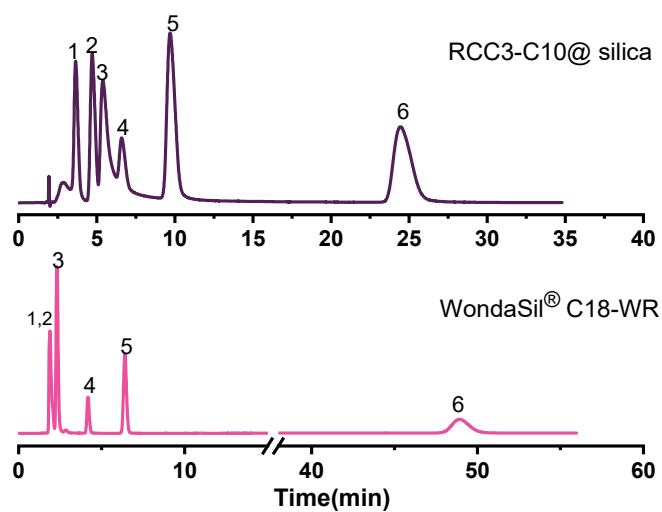

**Figure S11.** Chromatograms of phenol compounds on the RCC3-C10@silica column and WondaSil® C18-WR column. Analytes: (1) hydroquinone, (2) resorcinol, (3) catechol, (4) p-methyl phenol, (5) p-dimethyl phenol, (6) diphenyl ether. Mobile phase : 60% methanol/water (v/v). Flow rate: 1.0 ml/min; UV: 254 nm.

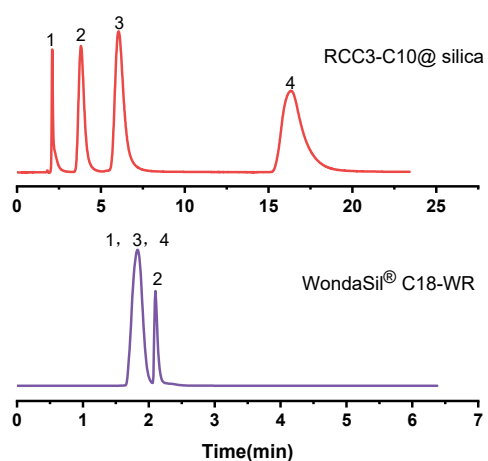

**Figure S12.** Chromatogram of nucleoside on the RCC3-C10@silica column and WondaSil® C18-WR column. Analytes: (1) cytidine, (2) thymidine, (3) guanosine, (4) inosine. Mobile phase: 30% methanol/ water; Flow rate: 1.0 mL/min; UV: 254 nm.

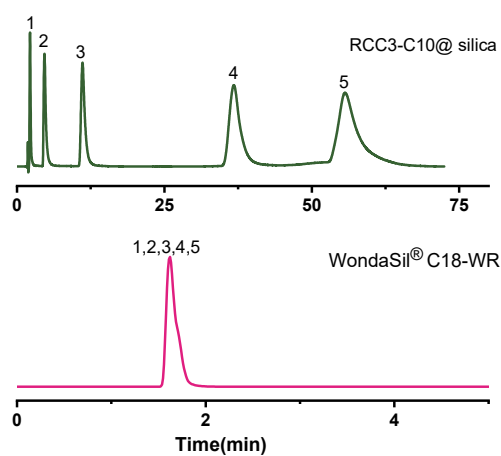

**Figure S13.** Chromatogram of sulfonamides on the RCC3-C10@silica column and

WondaSil<sup>®</sup> C18-WR column. Analytes: (1) sulfadiazine, (2) sulfadiazine, (3) sulfadiazine, (4) sulfadiazine, (5) sulfathiazole. Mobile phase: 80% methanol/water (v/v); Flow rate: 1.0 mL/min; UV: 254 nm.

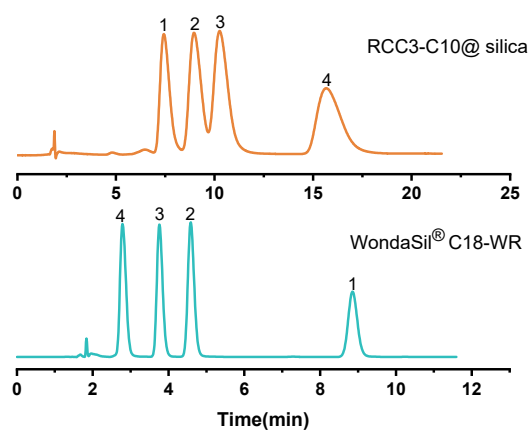

**Figure S14.** Chromatogram of flavanones on the RCC3-C10@silica column and WondaSil<sup>®</sup> C18-WR column. Analytes: (1) flavanones, (2) 6-hydroxyflavanones, (3) 4-hydroxyflavanones, (4) equol. Mobile phase: 70% methanol/water (v/v); Flow rate: 1.0 mL/min; UV: 254 nm.

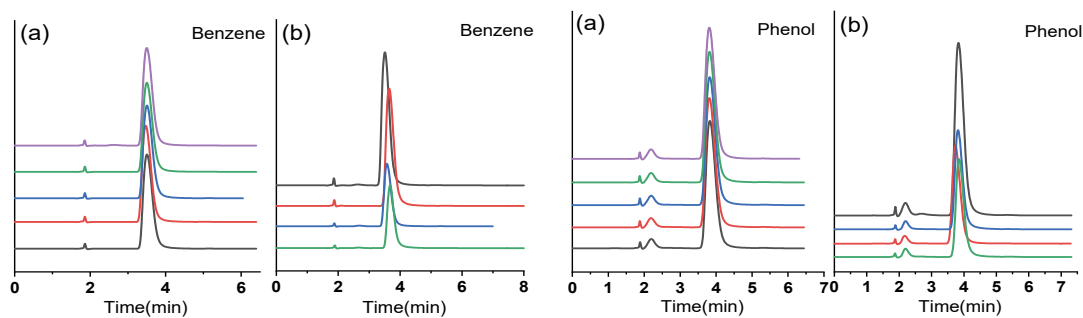

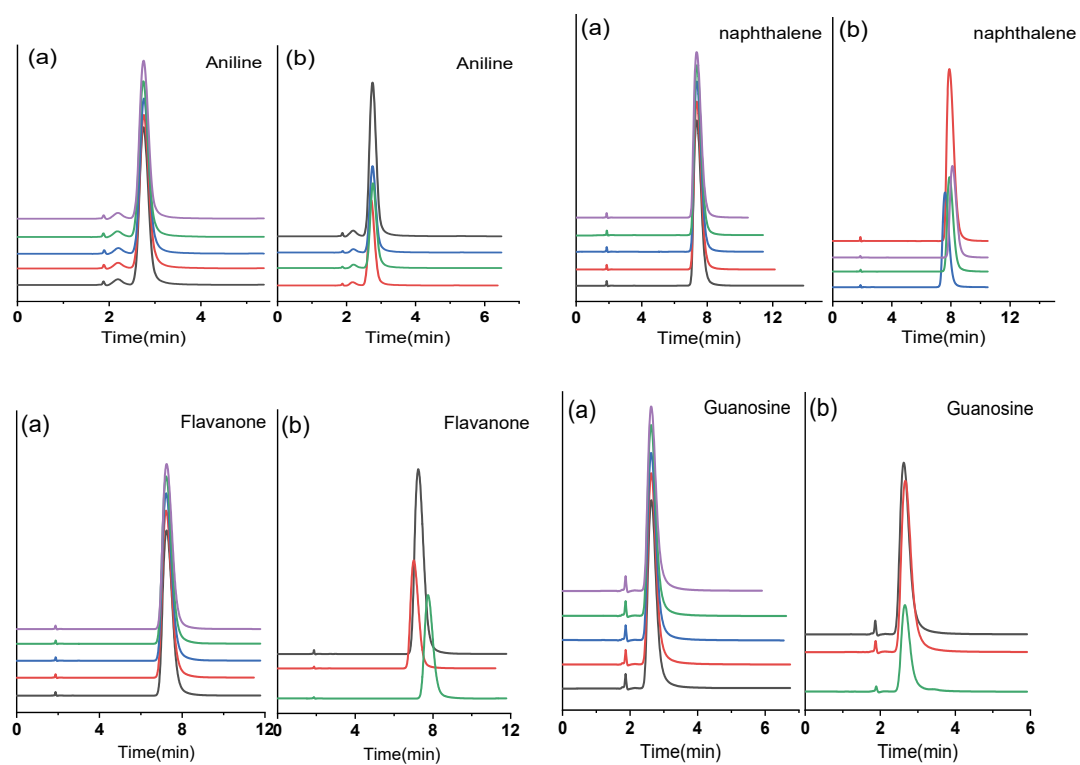

**Figure S15.** Repeatability of six compounds on RCC3-C10@silica column. (a) Intraday RSD of analyte, (b) Interday RSD of analyte.

**Table S1.** Retention factors and selection factors of Tanaka test analytes on RCC3-C10@silica column and WondaSil® C18-WR column.

| Solute       | RCC3-C10@silica |          | WondaSil® C18-WR |          |
|--------------|-----------------|----------|------------------|----------|
|              | k               | $\alpha$ | k                | $\alpha$ |
| caffeine     | 0.17            | 1        | 0.35             | 1        |
| uracil       | 0.32            | 1.88     | 0.23             | 0.66     |
| phenol       | 0.62            | 3.65     | 0.59             | 1.68     |
| butylbenzene | 1.63            | 1        | 8.11             | 1        |
| amylbenzene  | 2.16            | 1.32     | 11.95            | 1.47     |
| o-terphenyl  | 3.79            | 1        | 11.30            | 1        |
| triphenylene | 32.50           | 8.58     | 54.81            | 4.85     |

**Table S2.** Retention factors and selection factors of PAHs on the RCC3-C10@silica molecular cage column and WondaSil® C18-WR column.

| Solute                     | RCC3-C10@silica |          | WondaSil® C18-WR |          |
|----------------------------|-----------------|----------|------------------|----------|
|                            | k               | $\alpha$ | k                | $\alpha$ |
| 2-methylnaphthalene        | 1.01            | 1        | 1.04             | 1        |
| anthranone                 | 1.42            | 1.40     | 1.47             | 1.42     |
| p-Terphenyl                | 2.04            | 1.44     | 1.82             | 1.24     |
| pyrene                     | 2.93            | 1.44     | 3.13             | 1.72     |
| chrysene                   | 3.64            | 1.24     | 2.68             | 0.86     |
| triphenylene               | 5.20            | 2.55     | 3.31             | 1.82     |
| 1, 2:5, 6-dibenzanthracene | 8.46            | 1.63     | 7.76             | 2.34     |

**Table S3.** Retention factors and selection factors of polar aromatic analytes on the RCC3-C10@silica column and WondaSil® C18-WR column.

| Solute                  | RCC3-C10@silica |          | WondaSil® C18-WR |          |
|-------------------------|-----------------|----------|------------------|----------|
|                         | k               | $\alpha$ | k                | $\alpha$ |
| p-aminophenol           | 0.27            | 1        | 0.42             | 1        |
| m-aminophenol           | 0.53            | 1.96     | 0.42             | 1        |
| o-aminophenol           | 0.84            | 1.58     | 0.64             | 1.52     |
| phenol                  | 1.72            | 2.05     | 1.40             | 2.19     |
| hydroquinone            | 0.87            | 1        | 0.12             | 1        |
| resorcinol              | 1.41            | 1.62     | 0.21             | 1.75     |
| catechol                | 1.78            | 1.26     | 0.37             | 3.08     |
| p-methyl phenol         | 2.37            | 1        | 1.48             | 1        |
| p-dimethyl phenol       | 3.96            | 1.67     | 2.80             | 1.89     |
| diphenyl ether          | 11.6            | 2.93     | 28.03            | 10.01    |
| 3, 5-dimethyl phenol    | 3.70            | 1        | 3.55             | 1        |
| p-tert-butyl phenol     | 6.94            | 1.88     | 8.59             | 2.42     |
| 2-naphthol              | 9.02            | 1.30     | 3.81             | 0.44     |
| p-phenylenediamine      | 0.76            | 1        | 0.09             | 1        |
| m-phenylenediamine      | 1.06            | 1.39     | 0.09             | 1        |
| o-phenylenediamine      | 1.45            | 1.37     | 0.24             | 2.67     |
| aniline                 | 2.07            | 1.43     | 0.68             | 2.83     |
| p-toluidine             | 2.56            | 1        | 1.18             | 1        |
| 3, 4-dimethylamine      | 3.35            | 1.31     | 1.86             | 1.58     |
| 4, 4-biphenylenediamine | 4.95            | 1.48     | 0.36             | 0.19     |
| m-nitroaniline          | 6.07            | 1        | 0.95             | 1        |
| o-nitroaniline          | 7.62            | 1.26     | 1.05             | 1.10     |
